# Supplementary material
Source: MDPI journal article supplement (https://www.mdpi.com/2673-3293/5/1/7)
Supplement: s1 [file s1]

## SUPPLEMENTARY MATERIAL

## Molecular dynamic

Table S 1 Particle ratio in virtual cube

| [LiDFOB]<br>mol/kg | Number of<br>molecules | Number of<br>atoms |
|--------------------|------------------------|--------------------|
| 0.50               | 24475                  | 256970             |
| 0.75               | 16983                  | 174646             |
| 1.00               | 13237                  | 133485             |

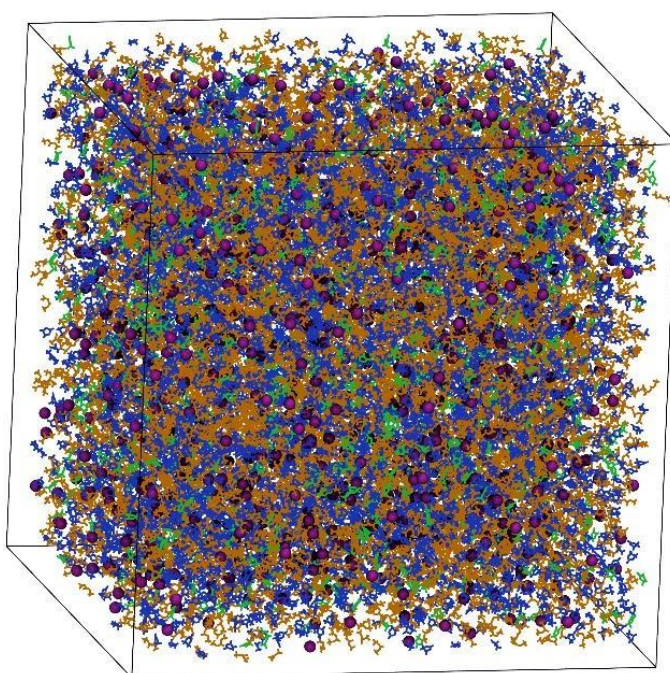

Figure S 1 Visualization virtual cubes of systems 1m LiDFOB (DMC/EC): lithium cations are shown as violet balls; DFOB<sup>-</sup> anions – as green molecules, molecules of DMC, EC are shown in blue, and orange colors respectively.

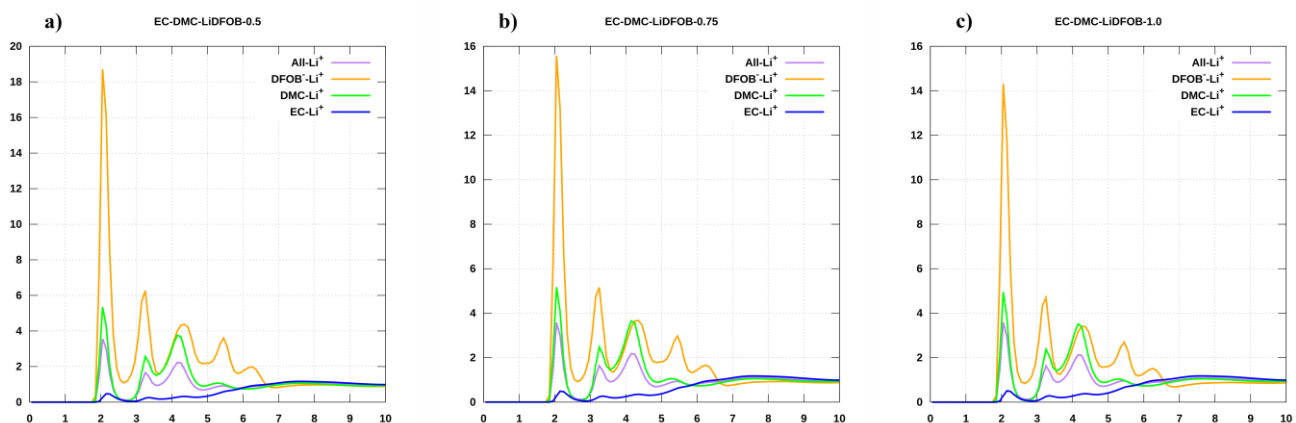

Figure S 2 Radial distribution function.

## NMR data

Table S 2 Chemical shifts (ppm) in  $^1\text{H}$  NMR spectra

| [LiDFOB], mol/kg | DMC/EC |      |
|------------------|--------|------|
|                  | DMC    | EC   |
| 0.5              | 3.57   | 4.39 |
| 0.75             | 3.56   | 4.40 |
| 1                | 3.51   | 4.35 |

Table S 3 Chemical shifts (ppm) in  $^{13}\text{C}$  NMR spectra

| [LiDFOB], mol/kg | DMC/EC                            |                     |                                    |                      |
|------------------|-----------------------------------|---------------------|------------------------------------|----------------------|
|                  | EC<br>( <u>C</u> H <sub>2</sub> ) | EC<br>( <u>C</u> O) | DMC<br>( <u>C</u> H <sub>3</sub> ) | DMC<br>( <u>C</u> O) |
| 0.5              | 65.2                              | 156.5               | 54.2                               | 156.4                |
| 0.75             | 65.4                              | 156.8               | 54.3                               | 156.5                |
| 1                | 66.0                              | 157.4               | 54.9                               | 157.0                |

Table S 4 Chemical shifts (ppm) in  $^7\text{Li}$ ,  $^{11}\text{B}$ ,  $^{17}\text{O}$ ,  $^{19}\text{F}$  NMR spectra

| [LiDFOB], mol/kg | EC/DMC        |                 |                                                                    |                                                                                                              |
|------------------|---------------|-----------------|--------------------------------------------------------------------|--------------------------------------------------------------------------------------------------------------|
|                  | $^7\text{Li}$ | $^{11}\text{B}$ | $^{19}\text{F}$                                                    | $^{17}\text{O}$                                                                                              |
| 0.5              | -0.61         | 3               | -155.7 ( $^{11}\text{BF}_4^-$ )<br>-155.6 ( $^{10}\text{BF}_4^-$ ) | 210 (C= <u>O</u> , EC),<br>110 ( <u>O</u> -, EC),<br>233<br>(C= <u>O</u> , DMC),<br>92<br>( <u>O</u> -, DMC) |
| 0.75             | -0.59         | 3               | -155.8 ( $^{11}\text{BF}_4^-$ )<br>-155.7 ( $^{10}\text{BF}_4^-$ ) |                                                                                                              |
| 1                | -0.11         | 3               | -155.4 ( $^{11}\text{BF}_4^-$ )<br>-155.3 ( $^{10}\text{BF}_4^-$ ) |                                                                                                              |

## Quantum chemistry

Table S 5 Values of the oxidative potential of the complexes

| [LiDFOB],<br>mol/kg | Complexes                                                     | $E^{\text{ox}}$ ,<br>V | N,<br>% | $E^{\text{ox}}_{\text{add}}$ ,<br>V | N<br>( $\Delta_f G^\circ$ ),<br>% | $E^{\text{ox}}_{\text{add(form)}}$ ,<br>V | N<br>( $\Delta_f G^\circ_{\text{inc}}$ ),<br>% | $E^{\text{ox}}_{\text{add(inc)}}$ ,<br>V |
|---------------------|---------------------------------------------------------------|------------------------|---------|-------------------------------------|-----------------------------------|-------------------------------------------|------------------------------------------------|------------------------------------------|
| DMC/EC              |                                                               |                        |         |                                     |                                   |                                           |                                                |                                          |
| 0.5                 | $\{\text{Li}^+\text{DFOB}^-\}(\text{DMC})_1(\text{EC})_1$     | 6.50                   | 69      | 6.35                                | 37                                | 6.31                                      | 35                                             | 6.23                                     |
|                     | $\{\text{Li}^+(\text{DFOB}^-)_2\}(\text{DMC})_1(\text{EC})_2$ | 5.81                   | 19      |                                     | 28                                |                                           | 30                                             |                                          |
|                     | $\{\text{Li}^+\text{DFOB}^-\}(\text{DMC})_2(\text{EC})_1$     | 6.32                   | 12      |                                     | 36                                |                                           | 34                                             |                                          |
| 0.75                | $\{\text{Li}^+\text{DFOB}^-\}(\text{DMC})_1(\text{EC})_1$     | 6.50                   | 63      | 6.44                                | 36                                | 6.41                                      | 35                                             | 6.40                                     |
|                     | $\{\text{Li}^+\text{DFOB}^-\}(\text{DMC})_2(\text{EC})_2$     | 6.31                   | 24      |                                     | 30                                |                                           | 31                                             |                                          |
|                     | $\{\text{Li}^+\text{DFOB}^-\}(\text{DMC})_1(\text{EC})_2$     | 6.39                   | 13      |                                     | 34                                |                                           | 34                                             |                                          |
| 1.0                 | $\{\text{Li}^+\text{DFOB}^-\}(\text{DMC})_1(\text{EC})_1$     | 6.50                   | 24      | 6.49                                | 49                                | 6.45                                      | 49                                             | 6.45                                     |
|                     | $\{\text{Li}^+\text{DFOB}^-\}(\text{DMC})_1(\text{EC})_2$     | 6.39                   | 76      |                                     | 51                                |                                           | 51                                             |                                          |
